# Supplementary material for: Formation of breathing pyrochlore lattices: structural, thermodynamic and crystal chemical aspects
Source: Royal Society of Chemistry journal article supplement (doi:10.1039/c9ce01635j), 2020-01-01
Supplement: c9ce01635j1.pdf [file c9ce01635j1.pdf]

## Electronic supplementary information

### Formation of breathing pyrochlore lattice: structural, thermodynamic and crystal chemical aspects

Mikhail V. Talanov, Valeriy M. Talanov

Let us consider the theoretical derivation of the  $F\bar{4}3m$  ordered pyrochlore structure from the disordered  $Fd\bar{3}m$  pyrochlore structure  $A^{16d}_2B^{16c}_2X^{48f}_6Y^{8b}$ . Choose the origin at Wyckoff position  $8a$  of  $Fd\bar{3}m$  space group. Then the atomic coordinates of the pyrochlore primitive cell (it contain two formula units) in the structures of the disordered and ordered phases are presented in Tables S1-S4.

Table S1. Atom A coordinates at position  $16d$  of the pyrochlore structure

| Atom number                                                                                                                   | 1                                                    | 2                                                    | 3                                                    | 4                                                    |
|-------------------------------------------------------------------------------------------------------------------------------|------------------------------------------------------|------------------------------------------------------|------------------------------------------------------|------------------------------------------------------|
| Coordinates of A atoms in the $Fd\bar{3}m$ structure of pyrochlore                                                            | $5/8,$<br>$5/8,$<br>$5/8$                            | $5/8,$<br>$3/8,$<br>$3/8$                            | $3/8,$<br>$5/8,$<br>$3/8$                            | $3/8,$<br>$3/8,$<br>$5/8$                            |
| Vector basis functions<br>(displacements of atoms A)                                                                          | 111                                                  | 1-1-1                                                | -11-1                                                | -1-11                                                |
| Coordinates of A atoms in the structure of $F\bar{4}3m$ pyrochlore (in the basis of the structure $Fd\bar{3}m$ of pyrochlore) | $5/8+\delta_A,$<br>$5/8+\delta_A,$<br>$5/8+\delta_A$ | $5/8+\delta_A,$<br>$3/8-\delta_A,$<br>$3/8-\delta_A$ | $3/8-\delta_A,$<br>$5/8+\delta_A,$<br>$3/8-\delta_A$ | $3/8-\delta_A,$<br>$3/8-\delta_A,$<br>$5/8+\delta_A$ |
| Coordinates of A atoms in the structure of $F\bar{4}3m$ pyrochlore (in the basis of the structure $F\bar{4}3m$ pyrochlore)    | $x,$<br>$x,$<br>$x$                                  | $x,$<br>$-x,$<br>$-x$                                | $-x,$<br>$x,$<br>$-x$                                | $-x,$<br>$-x,$<br>$x$                                |

Atoms A occupy Wyckoff positions  $16e$  ( $x, x, x$ ), where  $x = 5/8+\delta_A=0.625+\delta_A$  in the structure of ordered  $F\bar{4}3m$  pyrochlore

Table S2. Atom B coordinates at position 16c of the pyrochlore structure

| Atom number                                                                                                                   | 1                                                      | 2                                                      | 3                                                      | 4                                                      |
|-------------------------------------------------------------------------------------------------------------------------------|--------------------------------------------------------|--------------------------------------------------------|--------------------------------------------------------|--------------------------------------------------------|
| Coordinates of B atoms in the $Fd\bar{3}m$ structure of pyrochlore                                                            | 1/8,<br>1/8,<br>1/8                                    | 1/8,<br>3/8,<br>3/8                                    | 3/8,<br>1/8,<br>3/8                                    | 3/8,<br>3/8,<br>1/8                                    |
| Vector basis functions<br>(displacements of atoms B)                                                                          | 111                                                    | 1-1-1                                                  | -11-1                                                  | -1-11                                                  |
| Coordinates of B atoms in the structure of $F\bar{4}3m$ pyrochlore (in the basis of the structure $Fd\bar{3}m$ of pyrochlore) | $1/8+\delta_B$ ,<br>$1/8+\delta_B$ ,<br>$1/8+\delta_B$ | $1/8+\delta_B$ ,<br>$3/8-\delta_B$ ,<br>$3/8-\delta_B$ | $3/8-\delta_B$ ,<br>$1/8+\delta_B$ ,<br>$3/8-\delta_B$ | $3/8-\delta_B$ ,<br>$3/8-\delta_B$ ,<br>$1/8+\delta_B$ |
| Coordinates of B atoms in the structure of $F\bar{4}3m$ pyrochlore (in the basis of the structure $F\bar{4}3m$ pyrochlore)    | $x$ ,<br>$x$ ,<br>$x$                                  | $x$ ,<br>$-x$ ,<br>$-x$                                | $-x$ ,<br>$x$ ,<br>$-x$                                | $-x$ ,<br>$-x$ ,<br>$x$                                |

Atoms B occupy Wyckoff positions 16c ( $x, x, x$ ), where  $x = 1/8 + \delta_B = 0.125 + \delta_B$  in the structure of ordered  $F\bar{4}3m$  pyrochlore

Table S3. Atom X coordinates at position 48*f* of the pyrochlore structure

| Atom number                                                                                                                   | 1                             | 2                             | 3                            | 4                                      | 5                                      | 6                                     | 7                                   | 8                                | 9                               | 10                                    | 11                                    | 12                                   |
|-------------------------------------------------------------------------------------------------------------------------------|-------------------------------|-------------------------------|------------------------------|----------------------------------------|----------------------------------------|---------------------------------------|-------------------------------------|----------------------------------|---------------------------------|---------------------------------------|---------------------------------------|--------------------------------------|
| Coordinates of X atoms in the $Fd\bar{3}m$ structure of pyrochlore                                                            | x,<br>1/2,<br>1/2             | 1/2,<br>x,<br>1/2             | 1/2,<br>1/2,<br>x            | 1/4 +x,<br>1/4,<br>1/4                 | 1/4,<br>1/4<br>+x,<br>1/4              | 1/4,<br>1/4,<br>1/4 +x                | 1-x,<br>1/2,<br>1/2                 | 1/2,<br>1-x,<br>1/2              | 1/2,<br>1/2,<br>1-x             | 1/4-x,<br>1/4,<br>1/4                 | 1/4,<br>1/4-x,<br>1/4                 | 1/4,<br>1/4,<br>1/4-x                |
| Scalar basic functions                                                                                                        | 1                             | 1                             | 1                            | -1                                     | -1                                     | -1                                    | 1                                   | 1                                | 1                               | -1                                    | -1                                    | -1                                   |
| Vector basis functions (displacements of atoms X)                                                                             | 100                           | 010                           | 001                          | -100                                   | 0-10                                   | 00-1                                  | -100                                | 0-10                             | 00-1                            | 100                                   | 010                                   | 001                                  |
| Coordinates of X atoms in the structure of $F\bar{4}3m$ pyrochlore (in the basis of the structure $Fd\bar{3}m$ of pyrochlore) | $x+\delta_X$ ,<br>1/2,<br>1/2 | 1/2,<br>$x+\delta_X$ ,<br>1/2 | 1/2,<br>1/2,<br>$x+\delta_X$ | 1/4 +x-<br>$\delta_X$ ,<br>1/4,<br>1/4 | 1/4,<br>1/4<br>+x- $\delta_X$ ,<br>1/4 | 1/4,<br>1/4,<br>1/4 +x-<br>$\delta_X$ | 1-x-<br>$\delta_X$ ,<br>1/2,<br>1/2 | 1/2,<br>1-x- $\delta_X$ ,<br>1/2 | 1/2,<br>1/2,<br>1-x- $\delta_X$ | 1/4-<br>$x+\delta_X$ ,<br>1/4,<br>1/4 | 1/4,<br>1/4-<br>$x+\delta_X$ ,<br>1/4 | 1/4,<br>1/4,<br>1/4-<br>$x+\delta_X$ |
| Coordinates of X atoms in the structure of $F\bar{4}3m$ pyrochlore (in the basis of the structure $F\bar{4}3m$ pyrochlore)    | $x_1$<br>0,<br>0              | 0,<br>$x_1$<br>0              | 0,<br>0,<br>$x_1$            | $x_2$<br>1/4,<br>1/4                   | 1/4,<br>$x_2$ ,<br>1/4                 | 1/4,<br>1/4,<br>$x_2$                 | - $x_1$<br>0,<br>0                  | 0,<br>- $x_1$<br>0               | 0,<br>0,<br>- $x_1$             | $x_2$<br>1/4,<br>1/4                  | 1/4,<br>$x_2$ ,<br>1/4                | 1/4,<br>1/4,<br>$x_2$                |
| Wyckoff position                                                                                                              | 24 <i>f</i>                   | 24 <i>f</i>                   | 24 <i>f</i>                  | 24 <i>g</i>                            | 24 <i>g</i>                            | 24 <i>g</i>                           | 24 <i>f</i>                         | 24 <i>f</i>                      | 24 <i>f</i>                     | 24 <i>g</i>                           | 24 <i>g</i>                           | 24 <i>g</i>                          |

Atoms X occupy Wyckoff positions 24*f* ( $x_1=x+\delta_X+1/2$ ) and 24*g* ( $x_2=1/4+x-\delta_X$ ) where  $x$ - free parameter of Wyckoff position 48*f* in the initial  $Fd\bar{3}m$ -pyrochlore,  $\delta_X$ -magnitude of displacement

Table S4. Atom Y coordinates at position  $8b$  of the pyrochlore structure

| Atom number                                                                                                                   | 1                   | 2                   |
|-------------------------------------------------------------------------------------------------------------------------------|---------------------|---------------------|
| Coordinates of Y atoms in the $Fd\bar{3}m$ structure of pyrochlore                                                            | 1/2,<br>1/2,<br>1/2 | 3/4,<br>3/4,<br>3/4 |
| Scalar basic functions                                                                                                        | 1                   | -1                  |
| Coordinates of Y atoms in the structure of $F\bar{4}3m$ pyrochlore (in the basis of the structure $Fd\bar{3}m$ of pyrochlore) | 1/2,<br>1/2,<br>1/2 | 3/4,<br>3/4,<br>3/4 |
| Coordinates of Y atoms in the structure of $F\bar{4}3m$ pyrochlore (in the basis of the structure $F\bar{4}3m$ pyrochlore)    | 1/2,<br>1/2,<br>1/2 | 3/4,<br>3/4,<br>3/4 |
| Wyckoff position                                                                                                              | $4b$                | $4d$                |

Table S5. The role of order parameters in the  $Fd\bar{3}m \rightarrow F\bar{4}3m$  phase transitions in  $Ce_2Zr_2O_{7+\sigma}$ <sup>1</sup> and  $NH_4NbWO_6$ .<sup>2,3</sup> The amplitudes normalized with respect to the primitive unit cell of the parent phase.

| Irrep                               | Atom Wyckoff position | Amplitudes of distortions (Å) |              |
|-------------------------------------|-----------------------|-------------------------------|--------------|
|                                     |                       | $Ce_2Zr_2O_{7+\sigma}$        | $NH_4NbWO_6$ |
| $\mathbf{k}_{11}\tau_4(\Gamma_1^+)$ | 48f                   | 0.45373                       | 0.26247      |
|                                     | All                   | 0.45373                       | 0.26247      |
| $\mathbf{k}_{11}\tau_4(\Gamma_2^-)$ | 16d                   | 0.12223                       | -*           |
|                                     | 16c                   | 0.14445                       | 0.17222      |
|                                     | 48f                   | 0.46114                       | 0.26966      |
|                                     | All                   | 0.49845                       | 0.31996      |
| <b>Total</b>                        | All                   | 0.67404                       | 0.41384*     |

\*- displacement of ion  $NH_4^+$  was not taken into account

## References

1. S. N. Achary, S. K. Sali, N. K. Kulkarni, P. S. R. Krishna, A. B. Shinde and A. K. Tyagi, *Chem. Mater.* 2009, **21**, 5848.
2. P. W. Barnes, P. M. Woodward, Y. Lee, T. Vogt and J. A. Hriljac, *J. Am. Chem. Soc.*, 2003, **125**, 4572.
3. C. A. Perotoni, J. Haines and J. A. H. da Jornada, *J. Solid State Chem.*, 1998, **141**, 537.
